1  
2  
3  
4  
5  
6  
7  
8  
9

### **Visual field advantage: Redefined by training?**

10 Scott A. Stone<sup>1</sup>, Jared Baker<sup>2</sup>, Rob Olsen<sup>2</sup>, Robbin Gibb<sup>3</sup>, Jon Doan<sup>2,3</sup>, Joshua  
11 Hoetmer<sup>4</sup>, Claudia L.R. Gonzalez<sup>2,3</sup>

12

13 <sup>1</sup>Department of Psychology, University of Alberta, Edmonton, Alberta, Canada

14 <sup>2</sup>Department of Kinesiology, University of Lethbridge, Lethbridge, Alberta, Canada

15 <sup>3</sup>Department of Neuroscience, University of Lethbridge, Lethbridge, Alberta, Canada

16 <sup>4</sup>Center Coordinator, Alberta Sport Development Centre Southwest, Lethbridge, Alberta,  
17 Canada

18 Running head: Visual field advantage redefined

19 \*Corresponding author

20 E-mail: [sastone@ualberta.ca](mailto:sastone@ualberta.ca)

21 **Abstract**

22           In 1990, Fred Previc postulated that most peri-personal space interactions occurred in  
23 the lower visual field (LVF), leading to an advantage when compared to the upper visual field  
24 (UVF). It is not clear if extensive practice can affect the difference between interactions in the  
25 LVF/UVF. We tested male and female basketball varsity athletes and non-athletes on a  
26 DynaVision D2 visuomotor reaction task. We recruited basketball players because in their  
27 training they spend significant amount of time processing upper visual field information. We  
28 found a lower visual field advantage in all participants, but this advantage was significantly  
29 reduced in the athletes. The results suggest that training can be a powerful modulator of  
30 visuomotor function.

## 31 Introduction

32 Most of our interactions with the world generally happen in the space just in front of us  
33 (peri-personal) or just below us. For example, when eating, writing, reading, cooking, or picking  
34 up objects from a surface we are engaging our visuomotor system in the lower visual field  
35 (LVF). Importantly, there is evidence that the retina is organized to better support processing of  
36 information in the LVF versus the upper visual field (UVF; [1]). Curcio [1] showed that within the  
37 peripheral retina, the density of superior hemi-retina ganglion cells (i.e. the part of the retina  
38 processing LVF information) is significantly higher than the inferior hemi-retina ganglion cell  
39 density processing UVF information. It is possible that this LVF advantage may be the result of  
40 evolutionary pressures selecting for foraging and feeding behaviour [2]. Therefore, it is  
41 reasonable to expect behavioural differences in visual fields, with LVF being processed more  
42 efficiently than UVF.

43 In fact, studies have demonstrated that humans are more efficient when interacting  
44 with objects in the LVF compared to the UVF [3-8]. For example, Danckert and Goodale (2001a)  
45 showed that visually guided pointing movements in the LVF are significantly faster and more  
46 accurate than equivalent movements in UVF. Similarly, Brown, Halpert [9] showed that grasping  
47 behaviours in the LVF performed similarly; they were faster and more accurate than in the UVF.  
48 Taken together, these studies are consistent with the theory that the LVF is specialized for  
49 processing visual information relevant for action in peri-personal space [10, 11]. Functional  
50 magnetic resonance imaging studies have also demonstrated differences in visual field  
51 processing [7, 8]. In these studies, participants were presented with objects in either the LVF or  
52 UVF and then asked to either perform a reach-to-grasp movement towards the object or simply  
53 passively view it. These studies demonstrated greater BOLD activation in the dorsal visual  
54 stream, as well as the superior parieto-occipital cortex (SPOC), and the precuneus during LVF  
55 reach-to-grasp actions.

56 In the current study we explore the possibility that visual field differences can be  
57 modified with experience (i.e. are they plastic?). It has been suggested that throughout the  
58 lifespan, plasticity occurs all over the brain, including visual areas and pathways [12, 13]. We  
59 wondered if sports that require a greater amount of attention in the UVF, such as basketball,  
60 badminton, or volleyball would reduce the LVF advantage. These sports necessarily require its  
61 participants to be trained to attend and respond to UVF. As such it is possible that performance  
62 between the LVF and UVF is similar for these athletes. We tested this hypothesis in collegiate-  
63 level basketball players, a population trained in UVF performance and compared their  
64 behaviour to age and sex matched non-athletes. We used a DynaVision D2 visuomotor training  
65 device to assess the movement time of male/female basketball players (athletes) and  
66 male/female controls (non-athletes) during a reaction-time task. We predicted a LVF advantage  
67 in the control group but no such advantage in the athletes.

## 68 Methods

69 In this study, 40 right-handed young adults (20 female) participated (mean age: 20  
70 years, sd: 2.24). Both male and female groups consisted of 10 athletes and 10 non-athletes  
71 (control). All participants provided written informed consent prior to beginning the experiment.  
72 The study was approved by the University of Lethbridge Human Subject Research Committee  
73 under research protocol #2015-013.

#### 74 *Procedure*

##### 75 *DynaVision D2 Movement Time Task*

76 A DynaVision D2 light board (DynaVision International, USA) (Figure 1) was used to  
77 assess movement time. The apparatus consists of a board on which buttons are arranged in  
78 concentric rings. Each button contains a light-emitting diode (LED), which can be lit up to elicit a  
79 response from the participant (i.e. hit the button). When a button is pressed by the user, the  
80 board measures reaction time to the nearest 1/100 of a second. The DynaVision D2 is typically  
81 used for athletic training and assessment [14, 15]. Each participant removed their shoes to  
82 control for the degree of shoe comfort, and the lights were dimmed to increase the contrast of  
83 the LED on the buttons. The board contains a small LCD screen slightly above the center, which  
84 was covered so it would not distract the participant (See Figure 1). A white fixation cross, made  
85 of tape, was placed in the middle of the board. The board was then adjusted to the participant's  
86 eye-level to evenly split the UVF and LVF. Before starting, we ensured the participant could  
87 reach all buttons. The outermost light-ring was deactivated because not all participants could  
88 easily reach it. A custom program was created that made a single button light up in a pseudo-  
89 random location in either the UVF or LVF, which would change when the participant hit it. Each  
90 session lasted for a total of 60 seconds.

##### 91 *Movement time & score*

92 The movement time and score were recorded for each session. The average movement  
93 time was recorded for each quadrant of buttons. The score was calculated as the total number  
94 of buttons pressed during each 60-second session.

##### 95 *Practice sessions*

96 To become familiarized with the board, each participant was given two practice sessions  
97 lasting 60 seconds each. During these sessions, the lights could appear at any position on the  
98 board. Upon confirming the participant understood and was comfortable with the goal of the  
99 task, the session would begin. Practice session data was not used in analysis.

##### 100 *Sessions*

101 Each participant completed a total of four sessions of 60 seconds each. Two sessions  
102 took place in the UVF and the remaining two took place in the LVF. The starting visual field was  
103 counterbalanced across participants to eliminate any influence of starting visual field.

##### 104 *Trials*

105 The number of trials per session was dependent on the speed of the participant. One  
106 trial was equal to one button press. The inter-stimulus-interval was zero as upon pressing the  
107 button, a different button would light up. Each button would stay lit until it was pressed.

## 108 *Statistics*

109 The average movement time and score was recorded for each session. All statistical  
110 tests were performed on the average of the two sessions in each visual field. Results were  
111 considered significant at a p-value below 0.05. All data was analyzed offline using SPSS  
112 Statistics 24.0 for Windows (SPSS Inc., Chicago, IL, USA).

## 113 **Results**

### 114 **Handedness questionnaire**

115 All participants self-reported as right-handed. This was confirmed using a Modified  
116 Edinburgh Waterloo Handedness Questionnaire [16, 17]. The average score was +32.68(SD:  
117  $\pm 2.88$ ) with a possible score in the range of +44 (extremely right-handed) / -44 (extremely left-  
118 handed).

### 119 **DynaVision**

#### 120 Movement time – UVF versus LVF

121 The movement time for each button press was calculated as the time between the  
122 button first lighting up and being pressed. A repeated-measures ANOVA with visual field  
123 (upper/lower) as within factors and athletic status (athlete, non-athlete) and sex (female, male)  
124 as between factors was conducted. The results showed a main effect of UVF/LVF ( $F(1,36) =$   
125  $68.15$ ;  $p < 0.0001$ ,  $\eta^2 = 0.654$ ), a main effect of athletic status ( $F(1,36) = 22.16$ ;  $p < 0.0001$ ,  $\eta^2 =$   
126  $0.381$ ), but no main effect of sex ( $F(1,36) = 2.48$ ;  $p = 0.12$ ,  $\eta^2 = 0.064$ ). Participants responded  
127 faster in the LVF (mean = 619ms; sd: 131ms, se: 20ms) when compared to the UVF visual field  
128 (692ms; sd: 91ms, se: 14ms). Athletes (mean = 592ms; sd: 49ms, se: 11ms) were faster in their  
129 responses than non-athletes (mean = 720ms; sd: 130ms, se: 30ms). Importantly, there was a  
130 significant interaction (Figure 2a) between UVF/LVF and athletic status ( $F(1,36) = 16.46$ ;  $p <$   
131  $0.0001$ ,  $\eta^2 = 0.314$ ). Although participants in both groups reacted faster to stimuli in the LVF,  
132 the difference was greater in the non-athletes group (Athletes: ( $t(19) = 4.25$ ; Non-Athletes:  
133 ( $t(19) = 7.02$ ). No other interactions were significant ( $p > 0.05$ ).

#### 134 Scores – UVF versus LVF

135 The score was calculated as the number of buttons correctly hit by the participant  
136 during the 60 second session. A repeated-measures ANOVA with visual field (upper/lower) as  
137 within factors and athletic status (athlete, non-athlete) and sex (female, male) as between  
138 factors was conducted. The results showed a main effect of UVF/LVF ( $F(1,36) = 73.68$ ,  $p <$   
139  $0.0001$ ,  $\eta^2 = 0.672$ ), a main effect of athletic status ( $F(1,36) = 28.14$ ,  $p < 0.0001$ ,  $\eta^2 = 0.439$ )  
140 (Figure 2b.), but no main effect of sex ( $F(1,36) = 2.98$ ,  $p = 0.093$ ,  $\eta^2 = 0.076$ ). Participants hit

141 more buttons in the LVF (mean = 49.2; sd: 6.37, se: 1.42) when compared to UVF (mean = 44.4;  
142 sd: 7.19, se: 1.60). Athletes (mean = 50.97; sd: 3.50, se: 0.78) hit more buttons than non-  
143 athletes (mean = 42.6; sd: 6.21, se: 1.38). Similar to the results of movement time, a significant  
144 interaction (Figure 2b) was detected between UVF/LVF and athletic status ( $F(1,36) = 7.12, p <$   
145  $0.05$ ). There was a significant difference between the number of buttons successfully hit in the  
146 UVF and LVF in both groups, but the difference was greater in the non-athletes group (Athletes:  
147  $t(19) = -4.66$ ; Non-Athletes:  $t(19) = -7.33$ ). No other interactions were significant ( $p > 0.05$ ).

#### 148 Movement time – left versus right VF

149 Although our main question focused on differences between the LVF and UVF we  
150 conducted similar analyses on the left/right visual fields for movement time and score. None of  
151 the analyses (main effects or interactions) were significant (all  $P_s > 0.3$ ).

#### 152 **Discussion**

153 The present study had two investigative goals: 1) To quantify the MT difference within  
154 the UVF versus LVF using the DynaVision D2 basic visuomotor movement time task. 2) To  
155 determine if athletes, specifically basketball players, display experience-dependent plasticity in  
156 the UVF. Results showed that basketball players were faster than controls. In addition, all  
157 participants had consistently lower RTs in the LVF as compared to the UVF. Further, a significant  
158 interaction between the visual field (UVF/LVF) and athletic status (i.e. varsity basketball player  
159 or control) was revealed (Figure 2). The difference in MT between the UVF and LVF was  
160 reduced in the basketball players. This suggests that the experience the athletes had in their  
161 basketball training quickened their MT in the UVF. While it is possible the differences observed  
162 are due to the athletes' biomechanical advantages, this is unlikely because no differences were  
163 discovered when comparing the left and right visual fields. This suggests that the differences  
164 were 1) specific to the upper and lower visual fields and 2) due to a visuomotor coupling  
165 advantage only present in the athletic group.

166 Overall, we found that the athletes were faster than the non-athletes, which might be  
167 expected due to the structured training regimens adhered to by the athletes [18]. Allard and  
168 Starkes [18] recruited volleyball players and non-athletes to complete a task where the goal  
169 was to detect a volleyball in a rapidly presented slide. They found that while accuracy was  
170 similar between the groups, the volleyball players were significantly faster than their non-  
171 athletic counterparts. Furthermore, greater breadth of attention was reported in elite athletes  
172 when compared to novices, and that such differences varied as a function of athletic expertise  
173 [19]. In this study, the ability to devote attention to different objects was quantified as a  
174 function of athletic expertise. For example, soccer players were found to perform better at  
175 tasks that require greater horizontal breadth of attention whereas volleyball players show a  
176 similar effect in vertical space. These results align with the findings of the current study.

177 Studies investigating visual fields for differences have demonstrated increased  
178 efficiency in the LVF for visuomotor processing [3, 4, 6-8]. In the Danckert and Goodale (2001)

179 experiment, a pointing task was used to demonstrate that responses to targets in the LVF were  
180 always faster than in the UVF. Furthermore, as target size decreased, movement time and  
181 accuracy increased but only in the LVF. In other words, target size processing in LVF appears to  
182 be more sensitive. In contrast, movement time in the UVF does not seem to correspond to  
183 target size, suggesting less attention is given. The authors suggest that this is due to LVF's  
184 natural superiority in processing visual feedback, where the LVF has a functional bias for these  
185 types of movements. This result makes sense in the context of Curcio's (1990) finding of higher  
186 ganglion cell density in the peripheral retina that processes LVF information as compared to the  
187 UVF. This implies the LVF information is processed more efficiently, even pre-cortically. The  
188 results of the present study agree with Danckert and Goodale, as the LVF movement times  
189 were consistently lower than UVF. We suggest the lower movement times observed in LVF are  
190 driven by the functional bias of LVF for this type of stimulus.

191 It is possible that UVF indeed requires more effort to interact with, on both a muscular  
192 and visual processing level. Given that males in general tend to have significantly more muscle  
193 mass in the upper body than females (e.g. Janssen et al, 2000), we would expect to find  
194 significant differences between males and females for this task. As we do not find any  
195 difference in any of the measures, this effect is not likely simply driven by muscle mass  
196 differences in the groups. While the basketball players likely do have increased muscle mass in  
197 the upper body, it is unlikely it is significantly changing their performance in the UVF versus LVF  
198 portions of the board. While it is difficult to directly measure the influence of neuroplasticity as  
199 a result of visual system training, we feel that this is an appropriate ecologically valid task to  
200 assess this measure. Given that it is indeed harder to interact in the UVF, it makes ethological  
201 sense that the upper visual field would be under-represented in attention. Extensive training  
202 would enhance function in this area and result in better performance in those who trained  
203 more (i.e. basketball players).

204 The plastic nature of the brain allows for dynamic reorganization [13], especially when  
205 paired with endurance training regimens such as those used by varsity sports teams [20-22].  
206 We specifically recruited varsity basketball players as our athletic group because of the  
207 increased demand and exposure to UVF processing. Zwierko, Lubiński [23] measured visual  
208 evoked potentials (VEPs) in female volleyball players just prior to and following two years of  
209 intensive training. They found the latency of key visual conductivity signals in the VEP waveform  
210 was reduced after the training. Interestingly, they reported that the latency of the N75 (which is  
211 thought to originate in the primary visual cortex) was significantly reduced after training for  
212 stimuli occurring on the peripheral retina. In essence, training modified visual cortex activity  
213 through experience-dependent plasticity initiated at the peripheral retina. This is in line with  
214 the results of the current experiment because we propose that the lower movement times  
215 observed in the athletes are directly caused by plastic changes initiated at the level of the  
216 peripheral retina. We speculated that the increased amount of time basketball players spend  
217 processing stimuli in UVF would lead to an increase in performance in that field, ultimately  
218 reducing the advantage over LVF. This is precisely what we found; UVF processing was

219 enhanced in the athletic group (relative to non-athletes), resulting in a decreased (yet  
220 significant) difference between visual field RTs. It is possible that this enhancement is driven by  
221 cortical plasticity in the visual and visuomotor pathways, which continue to change as a result  
222 of experience throughout the lifespan [12]. Jensen, Marstrand [24] measured motor evoked  
223 potentials (MEPs) during a simple visuomotor task that involved moving the elbow to match  
224 patterns shown on a computer screen. The MEPs (measured via transcranial magnetic  
225 stimulation to motor cortex) were significantly increased after training, suggesting visuomotor  
226 training had affected visual and motor cortex connectivity. It is also worth noting that control of  
227 the elbow is performed by proximal muscle groups, which receive less corticospinal control [25]  
228 and are thought to be more important when playing most sports. Because basketball players  
229 spend a large amount of time processing UVF stimuli (e.g. looking for passes, watching the  
230 basketball hoop) and acting on those stimuli through motor coordination, it is reasonable to  
231 suppose that better performance in this field results from practice. Neuroimaging studies are  
232 needed to evaluate this speculation.

233 One final consideration is the lack of sex differences; we did not find a significant main  
234 effect of sex on MT in either visual field nor a significant interaction. Although some studies  
235 have found differences between the sexes in visuospatial tasks, it is possible that the difference  
236 in processing abilities between the UVF and LVF are so robustly conserved that sex has no  
237 effect on performance for this task.

238 In conclusion, we created a task and methodology to measure whether or not training  
239 and experience could change the typical performance difference between LVF- and UVF-  
240 processing. The results demonstrated this to be the case, suggesting that even the highly  
241 conserved differences in information processing in LVF and UVF can be modified through  
242 experience. The current finding has implications for both training and rehabilitation after  
243 nervous system damage.



## 244 References

- 245 1. Curcio, C.A. and K.A. Allen, *Topography of ganglion cells in human retina*. Journal of comparative  
246 Neurology, 1990. **300**(1): p. 5-25.
- 247 2. Milner, D. and M. Goodale, *The visual brain in action*. 2006: Oxford University Press.
- 248 3. Danckert, J. and M.A. Goodale, *Superior performance for visually guided pointing in the lower*  
249 *visual field*. Experimental Brain Research, 2001. **137**(3): p. 303-308.
- 250 4. Danckert, J.A. and M.A. Goodale, *Ups and downs in the visual control of action*. Taking action:  
251 Cognitive neuroscience perspectives on intentional acts, 2003: p. 29-64.
- 252 5. Khan, M.A. and G.P. Lawrence, *Differences in visuomotor control between the upper and lower*  
253 *visual fields*. Experimental Brain Research, 2005. **164**(3): p. 395-398.
- 254 6. Krigolson, O. and M. Heath, *A lower visual field advantage for endpoint stability but no*  
255 *advantage for online movement precision*. Experimental brain research, 2006. **170**(1): p. 127-  
256 135.
- 257 7. Rossit, S., et al., *fMRI reveals a lower visual field preference in dorsal visual stream regions*  
258 *during hand actions*. Journal of Vision, 2011. **11**(11): p. 952-952.
- 259 8. Rossit, S., et al., *fMRI reveals a lower visual field preference for hand actions in human superior*  
260 *parieto-occipital cortex (SPOC) and precuneus*. Cortex, 2013. **49**(9): p. 2525-2541.
- 261 9. Brown, L.E., B.A. Halpert, and M.A. Goodale, *Peripheral vision for perception and action*.  
262 Experimental Brain Research, 2005. **165**(1): p. 97-106.
- 263 10. Previc, F.H., *Functional specialization in the lower and upper visual fields in humans: Its*  
264 *ecological origins and neurophysiological implications*. Behavioral and Brain Sciences, 1990.  
265 **13**(03): p. 519-542.
- 266 11. Previc, F.H., *The neuropsychology of 3-D space*. Psychological bulletin, 1998. **124**(2): p. 123.
- 267 12. Kolb, B. and R. Gibb, *Searching for the principles of brain plasticity and behavior*. Cortex, 2014.  
268 **58**: p. 251-260.
- 269 13. Kaas, J.H., *Plasticity of sensory and motor maps in adult mammals*. Annual review of  
270 neuroscience, 1991. **14**(1): p. 137-167.
- 271 14. Schwab, S. and D. Memmert, *The impact of a sports vision training program in youth field hockey*  
272 *players*. Journal of Sports Science and Medicine, 2012. **11**(4): p. 624-631.
- 273 15. Wells, A.J., et al., *Reliability of the dynavision™ d2 for assessing reaction time performance*.  
274 Journal of sports science and medicine, 2014. **13**(1): p. 145-150.
- 275 16. Brown, S.G., et al., *Using hand performance measures to predict handedness*. Laterality, 2006.  
276 **11**(1): p. 1-14.
- 277 17. Oldfield, R.C., *The assessment and analysis of handedness: the Edinburgh inventory*.  
278 Neuropsychologia, 1971. **9**(1): p. 97-113.
- 279 18. Allard, F. and J.L. Starkes, *Perception in sport: Volleyball*. Journal of Sport psychology, 1980. **2**(1):  
280 p. 22-33.
- 281 19. Hüttermann, S., D. Memmert, and D.J. Simons, *The size and shape of the attentional "spotlight"*  
282 *varies with differences in sports expertise*. Journal of Experimental Psychology: Applied, 2014.  
283 **20**(2): p. 147.
- 284 20. Kramer, A.F. and K.I. Erickson, *Capitalizing on cortical plasticity: influence of physical activity on*  
285 *cognition and brain function*. Trends Cogn Sci, 2007. **11**(8): p. 342-8.
- 286 21. Thomas, A., et al., *The effects of aerobic activity on brain structure*. Frontiers in psychology,  
287 2012. **3**: p. 86.
- 288 22. Kumpulainen, S., et al., *Differential modulation of motor cortex plasticity in skill- and endurance-*  
289 *trained athletes*. European Journal of Applied Physiology, 2015. **115**(5): p. 1107-1115.

- 290 23. Zwierko, T., et al., *Does athletic training in volleyball modulate the components of visual evoked*  
291 *potentials? A preliminary investigation*. Journal of sports sciences, 2014. **32**(16): p. 1519-1528.
- 292 24. Jensen, J.L., P.C.D. Marstrand, and J.B. Nielsen, *Motor skill training and strength training are*  
293 *associated with different plastic changes in the central nervous system*. Journal of Applied  
294 Physiology, 2005. **99**(4): p. 1558-1568.
- 295 25. Lemon, P.R. and R. Porter, *Corticospinal function and voluntary movement*. 1993, New York:  
296 Oxford.

297 **Figures**

298 **FIG1.TIFF**

299 Figure 1. A participant completing the DynaVision reaction time task. The participant fixated on  
300 the white cross in the center for the duration of the 60-second session. A single button would  
301 light up until the participant hit it. Reaction time for each button press was recorded. Both  
302 written and informed consent was obtained from participant for the publication of this image.

303 **FIG2.TIFF**

304 Figure 2. A bar graph illustrating the average MT (A) and number of buttons pressed (B) in the  
305 LVF and UVF within the athlete or non-athlete groups. A significant main effect of visual field  
306 was revealed, with participants' LVF responses being faster than UVF, regardless of athletic  
307 status. Standard error of each measure is shown. A significant interaction between athletic  
308 status and visual field was revealed. The differences in MT and number buttons pressed  
309 between the visual fields were smaller in athletes than in non-athletes.

D<sup>+</sup>NAVISON™

D<sup>+</sup>  
SPORTS

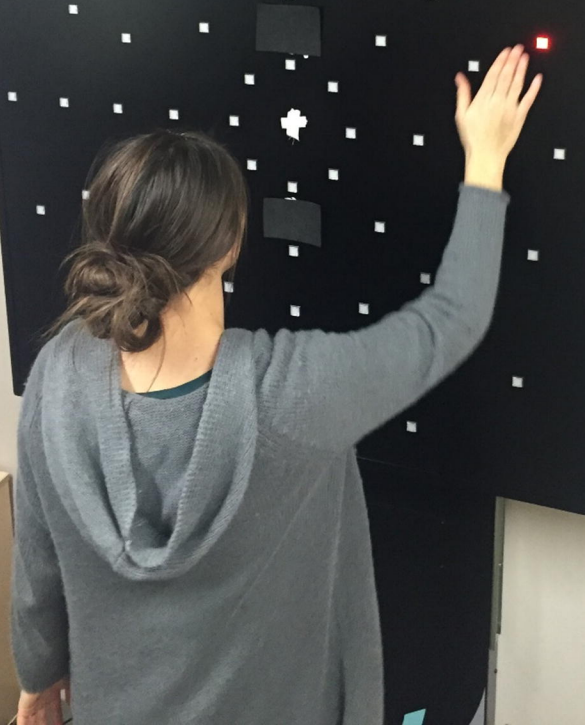

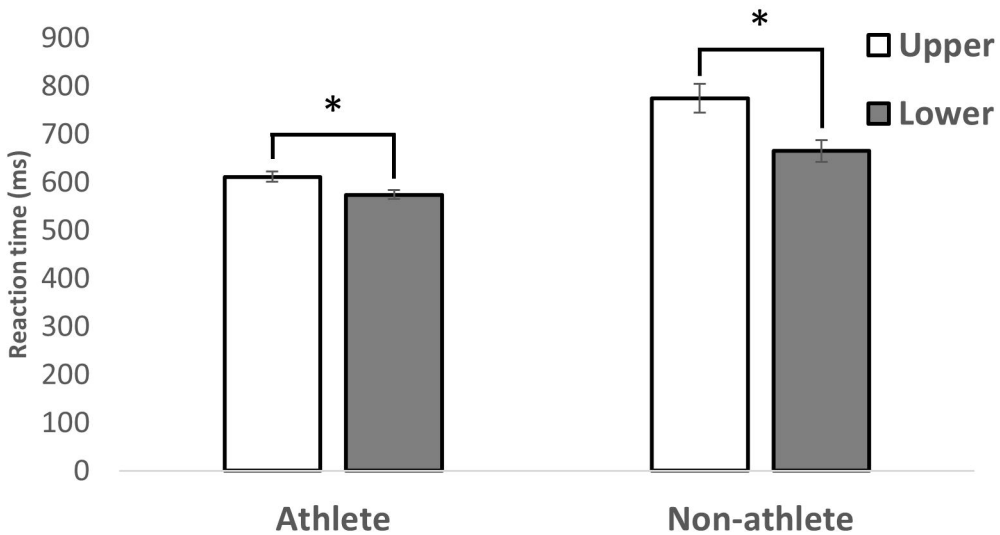

**a**

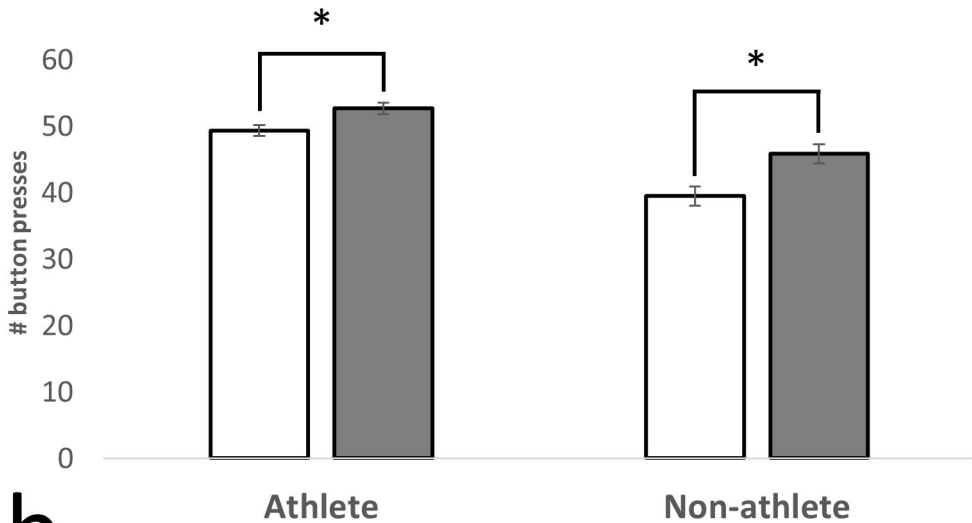

**b**
